# Supplementary material for: Inflammation and ER Stress Downregulate BDH2 Expression and Dysregulate Intracellular Iron in Macrophages
Source: Hindawi journal article supplement (doi:10.1155/2014/140728), 2014-01-01

## Inflammation and ER stress downregulate BDH2 expression and dysregulate intracellular iron in macrophages

Susu M. Zughaier<sup>\*1†</sup>, Brandon B. Stauffer<sup>2</sup>, Nael A. McCarty<sup>2</sup>

### Supplementary Figures:

**Supplementary Figure 1: Cellular viability and iron retention in tunicamycin treated macrophages.** **A:** Cellular viability of THP-1 cells treated with tunicamycin doses prior to LPS exposure was assessed using the MTT assay (MTT OD-A591). **B:** THP-1 cells ( $1 \times 10^6$  cell/ml) were treated with tunicamycin doses or DMSO overnight prior to LPS exposure (40 ng/ml) for 6 hr and iron retention in macrophages was determined using calcein-AM. DMSO treated cells were incubated simultaneously and used as controls. Calcein-AM fluorescence is quenched upon binding iron and is therefore inversely correlated with intracellular iron accumulation. AU: arbitrary units. Error bars represent the SD from the mean of triplicate readings and data are representative of two independent experiments.

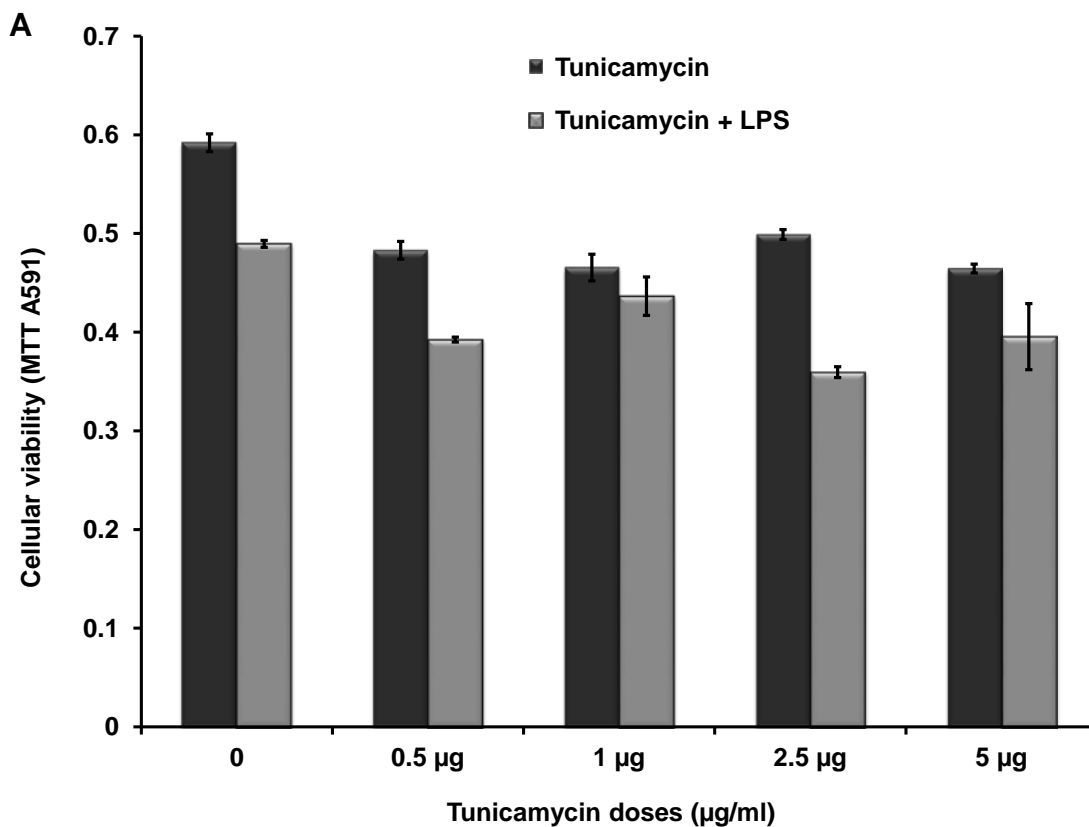

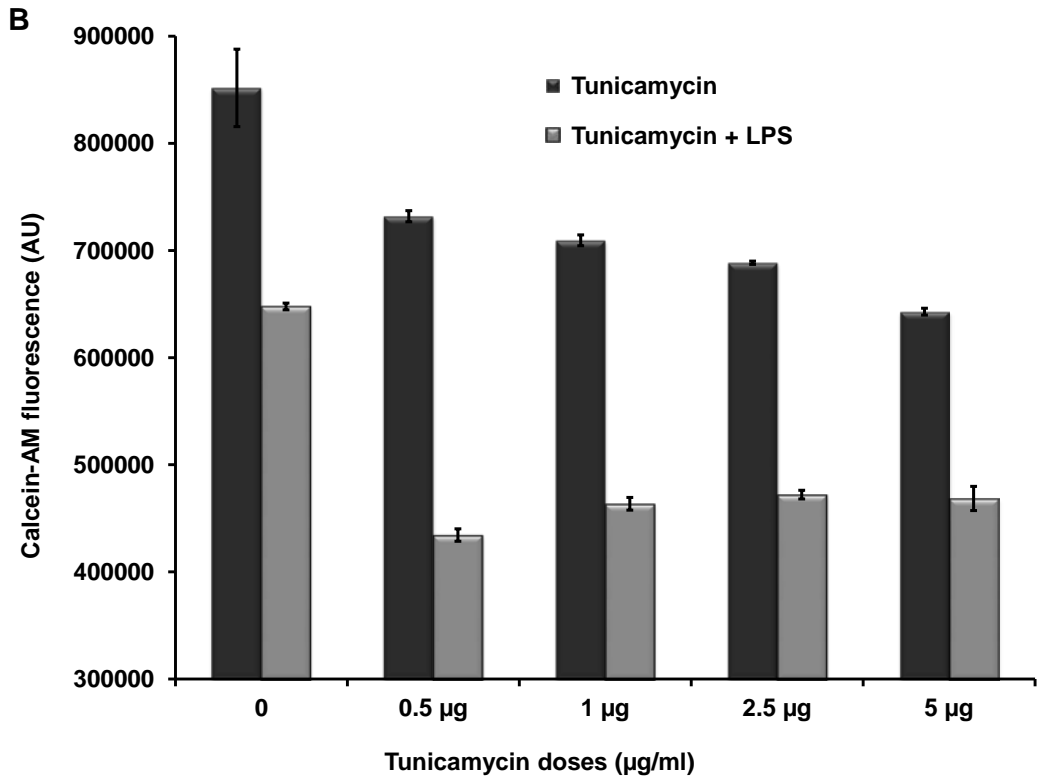

Supplement: f1 [file 140728.f1.pdf]
